# Supplementary material
Source: PubMed Central journal article supplement (PMC2757829)
Supplement: 0904293106_0904293106SI.pdf [file 0904293106_0904293106SI.pdf]

# Supporting Information

Zhou and Graham 10.1073/pnas.0904293106

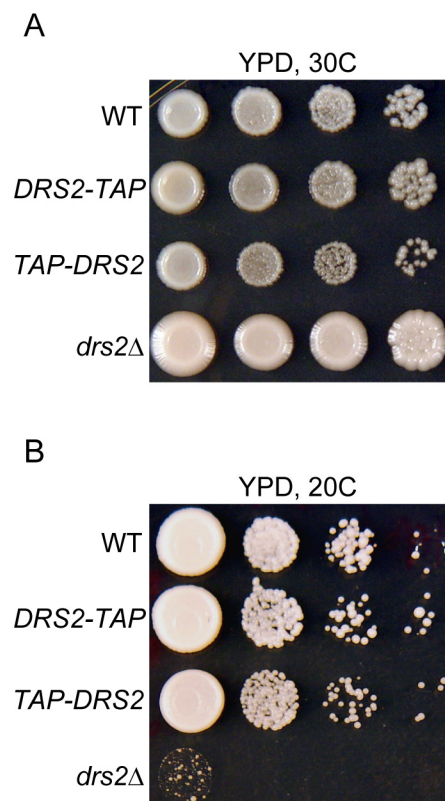

**Fig. S1.** Growth phenotype of yeast strains WT (*DRS2; atp2Δ*), *DRS2-TAP* (*DRS2::TAP; atp2Δ*), *TAP-DRS2* (*TAP::DRS2; atp2Δ*), and *drs2Δ* (*drs2Δ; ATP2*) at 30 °C (A) and 20 °C (B). Note that the *drs2Δ* strain grew better than others at 30 °C because of its intact *ATP2* gene (mitochondrial F1-ATPase), but it exhibited a growth defect at 20 °C.



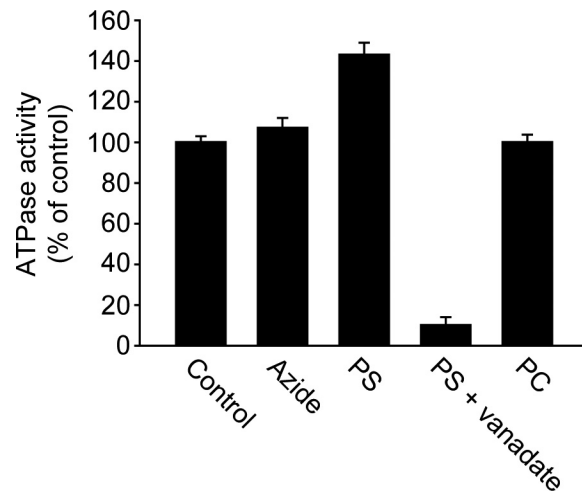

**Fig. S3.** ATPase activity of purified TAP-Drs2p. ATP hydrolysis was assayed as described in *Materials and Methods* in the presence of azide (1 mM), PS (POPS, 400  $\mu$ M), PS (POPS, 400  $\mu$ M plus vanadate (orthovanadate, 80  $\mu$ M), or PC (POPC, 400  $\mu$ M). Phospholipids were incubated with TAP-Drs2p for 10 min at room temperature before the addition of ATP.

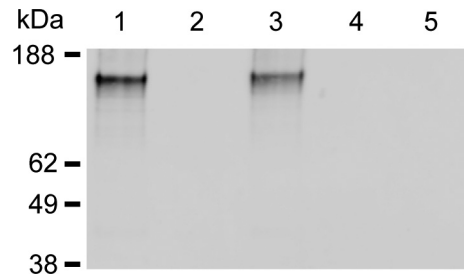

**Fig. S4.** Protease protection assay of TAP-Drs2p proteoliposomes using trypsin. Proteoliposomes were incubated with 0.001% (wt/vol) trypsin at 37 °C for 5 min, and trypsin digestion was stopped by addition of trypsin inhibitors (5 mM benzamidine hydrochloride, 2.5  $\mu$ M aprotinin, 40  $\mu$ M leupeptin, and 10 mM PMSF) before mixing with SDS/PAGE sample buffer. Drs2p was detected by Western blotting as described in Fig. S2 using a primary antibody that recognizes the ATPase domain of Drs2p. Lane 1, proteoliposomes alone; lane 2, proteoliposomes incubated with trypsin before addition of trypsin inhibitors; lane 3, proteoliposomes incubated with trypsin in the presence of trypsin inhibitors; lane 4, proteoliposomes incubated with trypsin in the presence of 0.1% Triton X-100; Lane 5, trypsin only.

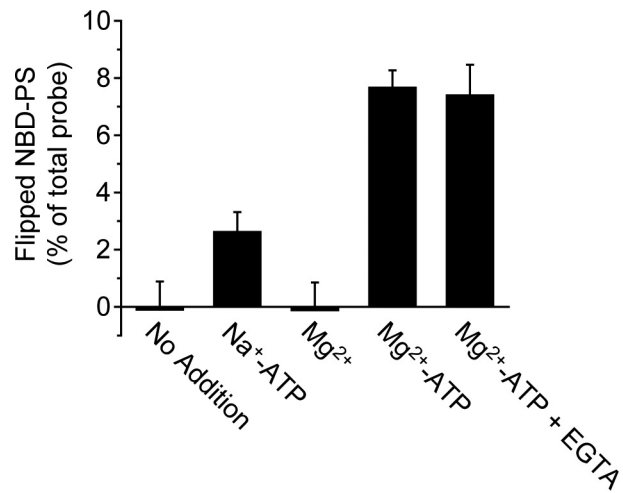

**Fig. S5.** Flippase assay with TAP-Drs2p proteoliposomes containing NBD-PS. Proteoliposomes were incubated with no addition (proteoliposomes alone), Na<sup>+</sup>-ATP (5 mM), Mg<sup>2+</sup> (5 mM), Mg<sup>2+</sup>-ATP (5 mM), or Mg<sup>2+</sup>-ATP (5 mM) plus EGTA (1 mM) at 37 °C for 30 min, and NBD-PS flipping was measured as described in *Materials and Methods*. Results were averaged from 4–6 independent experiments.

**Table S1. Proteins identified in Drs2p-TAP preparations**

| Protein name        | Peptides recovered |
|---------------------|--------------------|
| Drs2p               | 177                |
| Cdc50p              | 17                 |
| Vtc4p               | 16                 |
| Ssa1p               | 11                 |
| Atp1p*              | 10                 |
| Atp2p <sup>†</sup>  | 7                  |
| Pma1p               | 7                  |
| Vtc3p               | 6                  |
| Rpl4ap <sup>‡</sup> | 5                  |
| Rtn1p               | 4                  |
| Tdh3p               | 4                  |
| Vtc2p               | 4                  |
| Dnf1p               | 3                  |
| Por1p               | 3                  |
| Sac1p               | 3                  |
| Cdc19p              | 2                  |
| Eno1p               | 2                  |
| Hsp26p              | 2                  |
| Kar2p               | 2                  |
| Rcy1p               | 2                  |
| Ssa2p               | 2                  |
| Tdh1p               | 2                  |
| Tub2p               | 2                  |
| Tef1p               | 1                  |

\* $\alpha$  subunit of F1-ATPase.

<sup>†</sup> $\beta$  subunit of F1-ATPase.

<sup>‡</sup>Several additional ribosomal proteins detected by mass spectrometry are not listed.

**Table S2. Secondary structure prediction from circular dichroism spectra (200–240 nm) of Drs2p by the K2D2 web server ([www.ogic.ca/projects/k2d2](http://www.ogic.ca/projects/k2d2))**

| %              | TAP-Drs2p | Drs2p-TAP |
|----------------|-----------|-----------|
| $\alpha$ helix | 31.63     | 47.81     |
| $\beta$ strand | 13.51     | 10.21     |
| Other          | 54.86     | 41.98     |
